# Supplementary material for: On the generality of the superarmament of glycosyl donors
Source: Royal Society of Chemistry journal article supplement (doi:10.1039/c7ob02966g), 2018-01-01
Supplement: c7ob02966g1.pdf [file c7ob02966g1.pdf]

Supporting Information for

# On the Generality of Superarmament of Glycosyl Donors

Lulu Teresa Poulsen, Mads Heuckendorff and Henrik H. Jensen\*

*Contribution from the Department of Chemistry, Aarhus University, Langelandsgade 140*

*DK-8000 Aarhus C, Denmark*

*E-mail: hhj@chem.au.dk*

## Glycosylation Tables

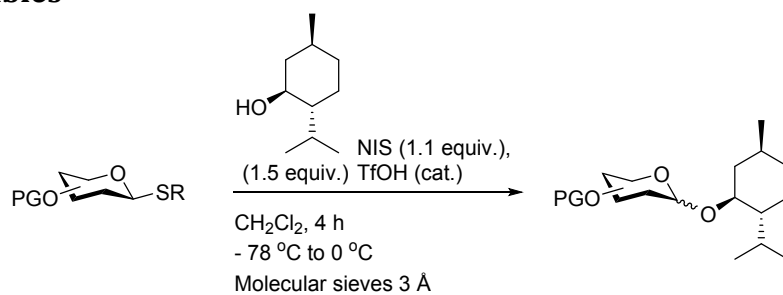

| Entry | Donor    | Yield | $\alpha/\beta$ ratio | Recovered SM |
|-------|----------|-------|----------------------|--------------|
| 1     | <p>1</p> | 94 %  | 1 : 3                | -            |
| 2     | <p>2</p> | 81 %  | $\beta$ only         | -            |
| 3     | <p>3</p> | 81 %  | 1 : 9                | -            |
| 4     | <p>4</p> | 84 %  | $\beta$ only         | -            |
| 5     | <p>5</p> | 25 %  | 1 : 3                | 64 %         |
| 6     | <p>6</p> | 46 %  | $\beta$ only         | 40 %         |

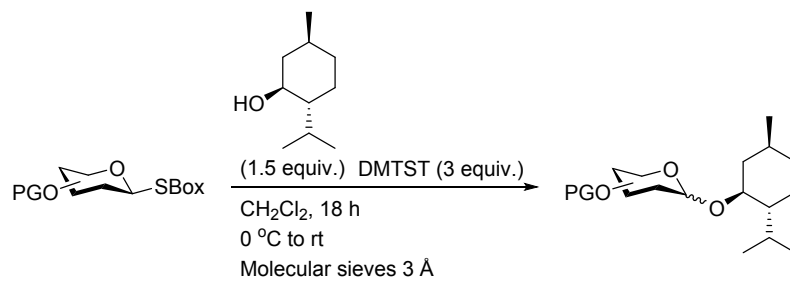

| Entry | Donor           | Yield | $\alpha/\beta$ ratio |
|-------|-----------------|-------|----------------------|
| 1     | <p><b>5</b></p> | 88 %  | 1 : 1.1              |
| 2     | <p><b>6</b></p> | 89 %  | $\beta$ only         |

# <sup>1</sup>H and <sup>13</sup>C NMR Spectra for Compounds.

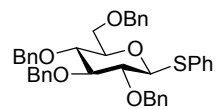

<sup>1</sup>H-NMR, CDCl<sub>3</sub>, 400 MHz

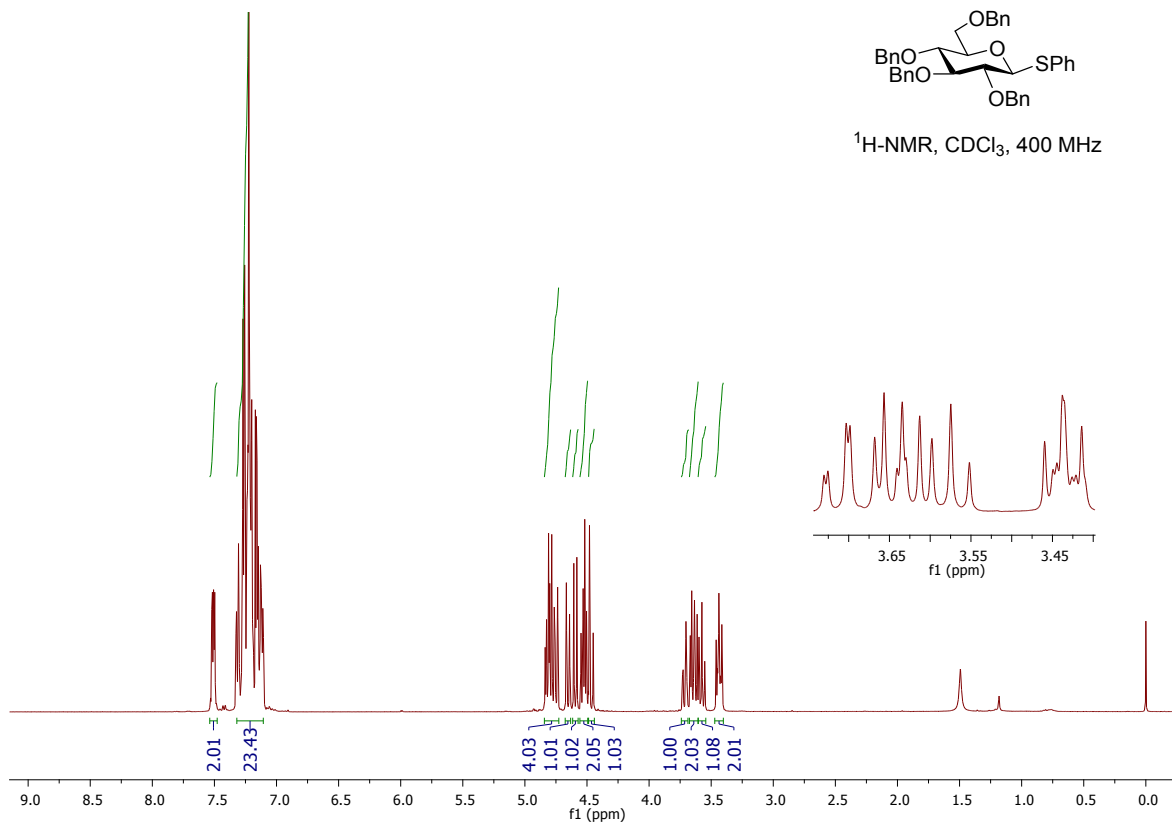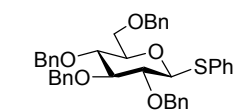

<sup>13</sup>C-NMR, CDCl<sub>3</sub>, 101 MHz

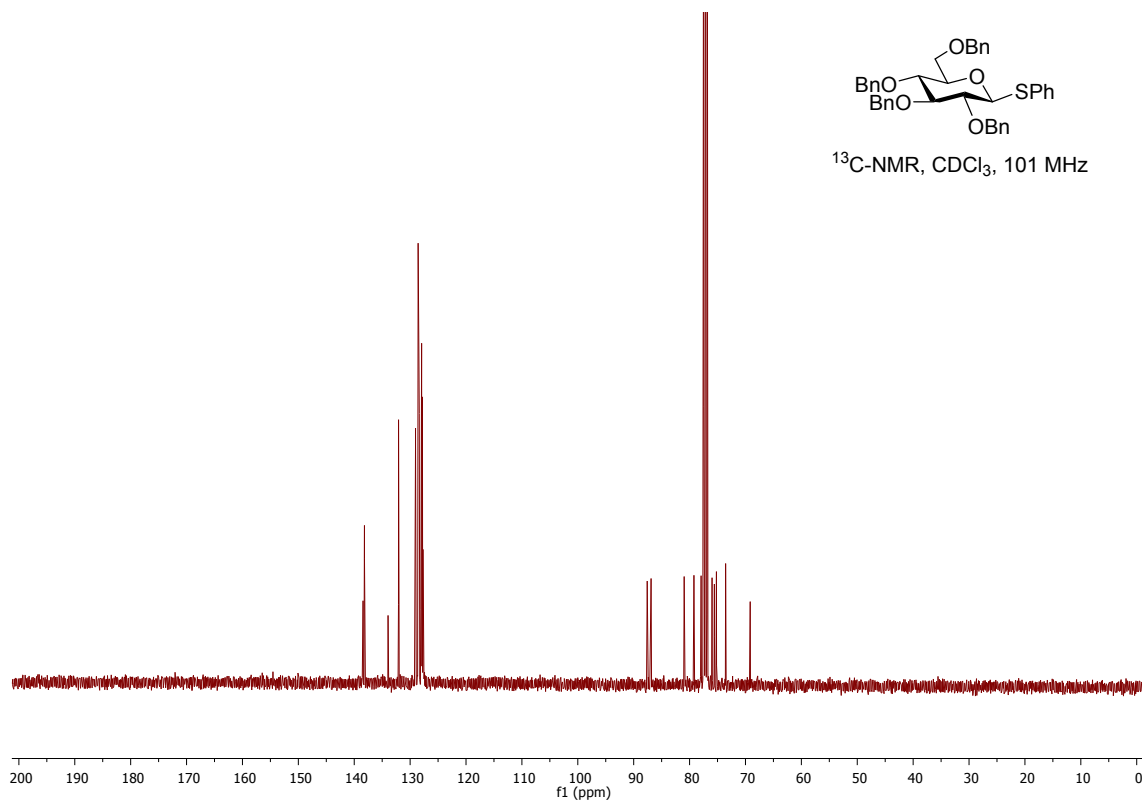

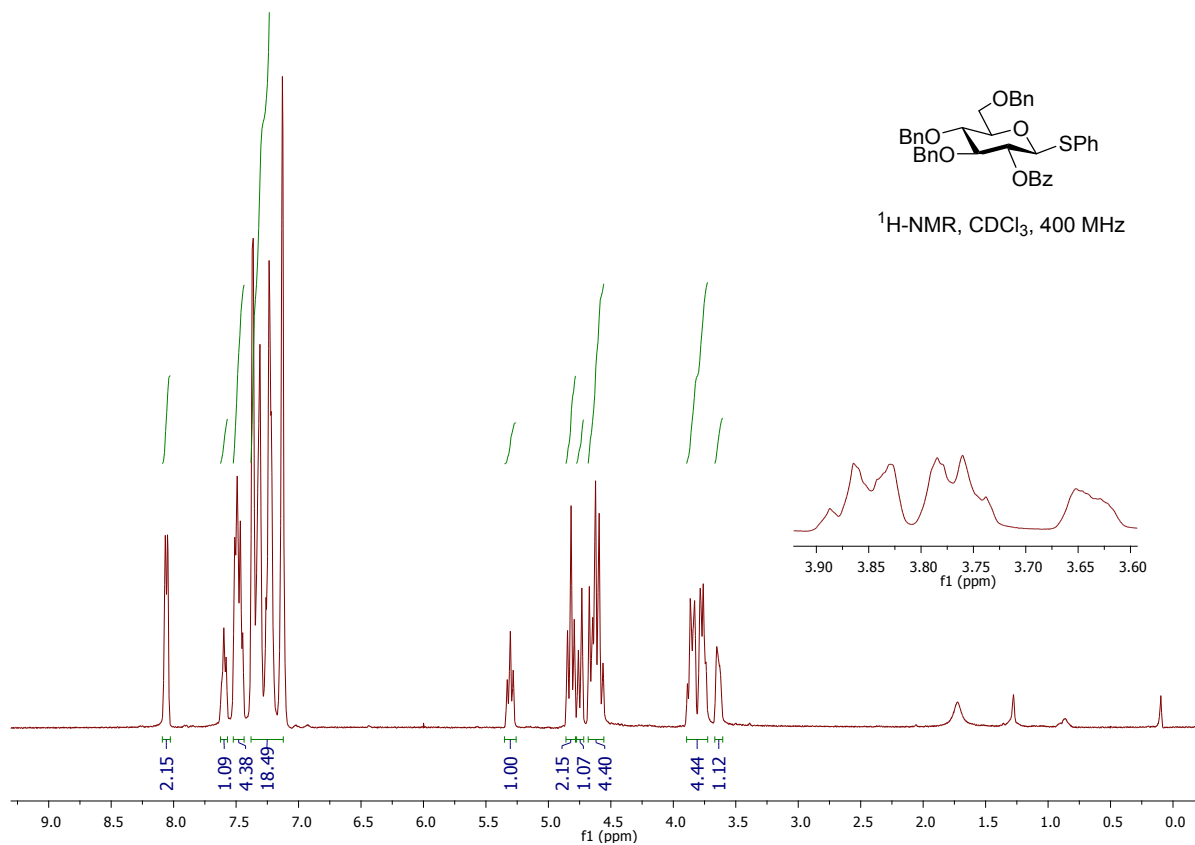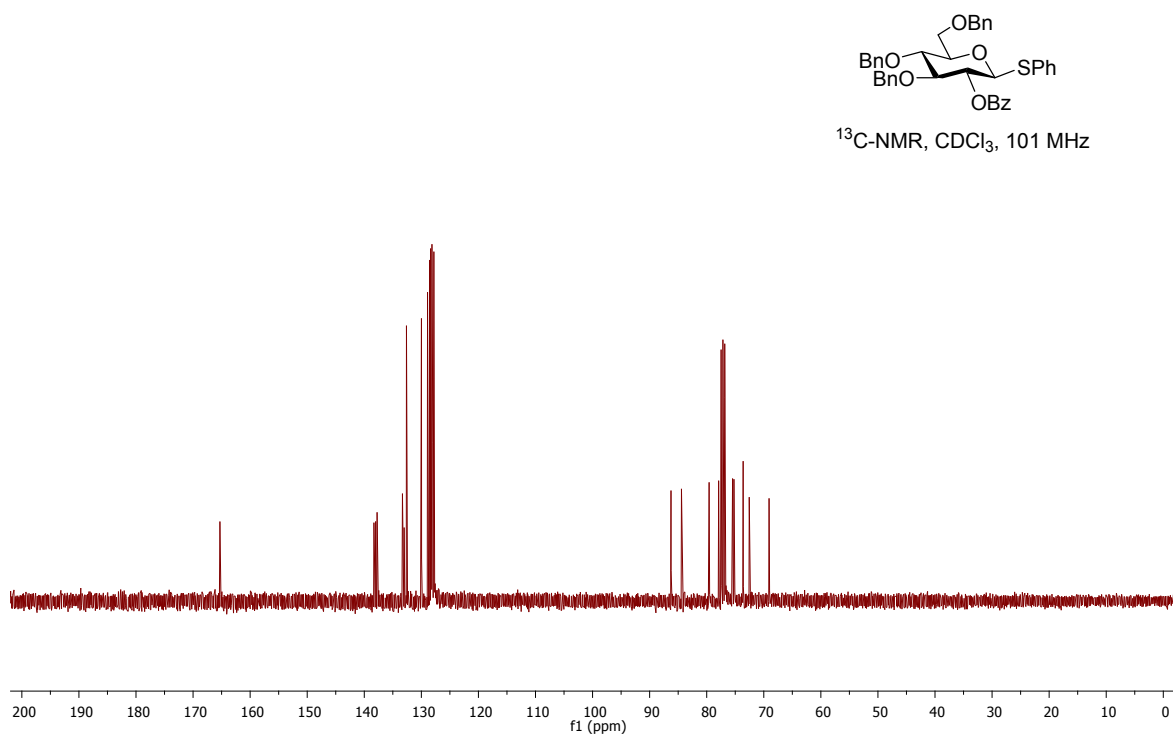

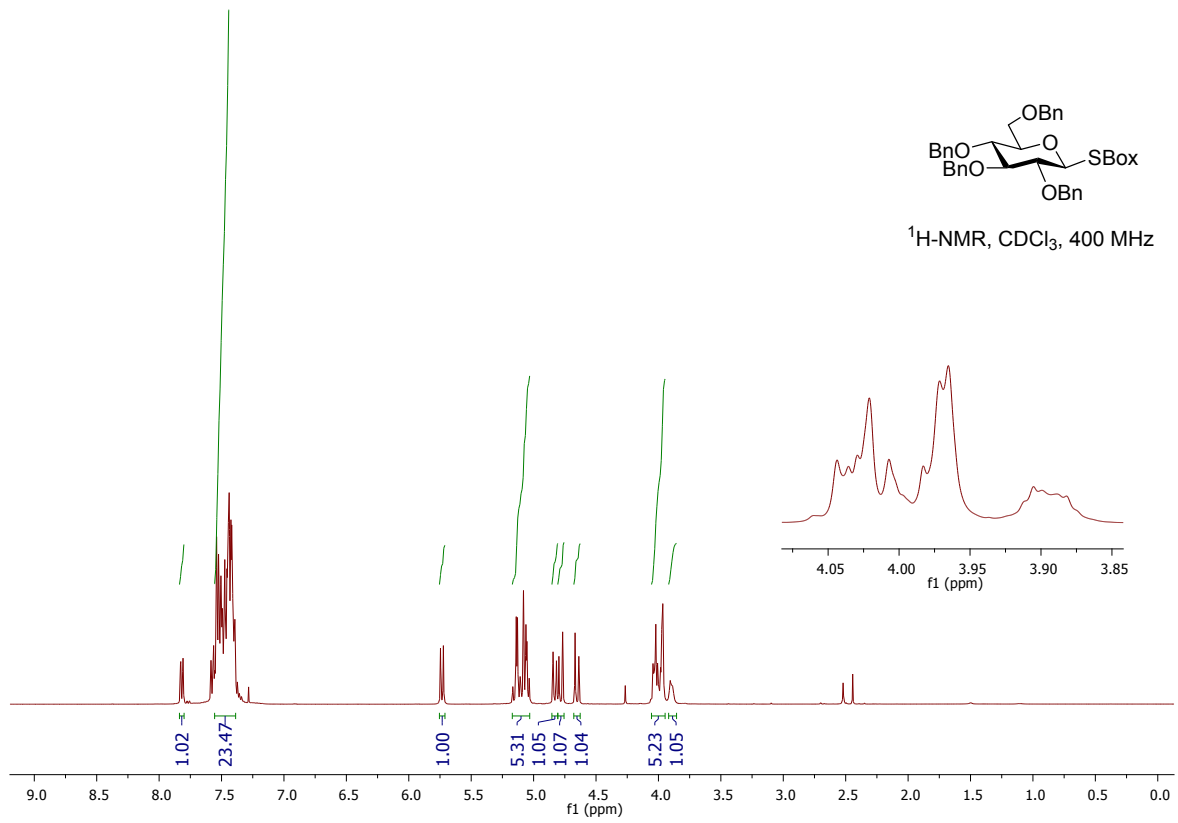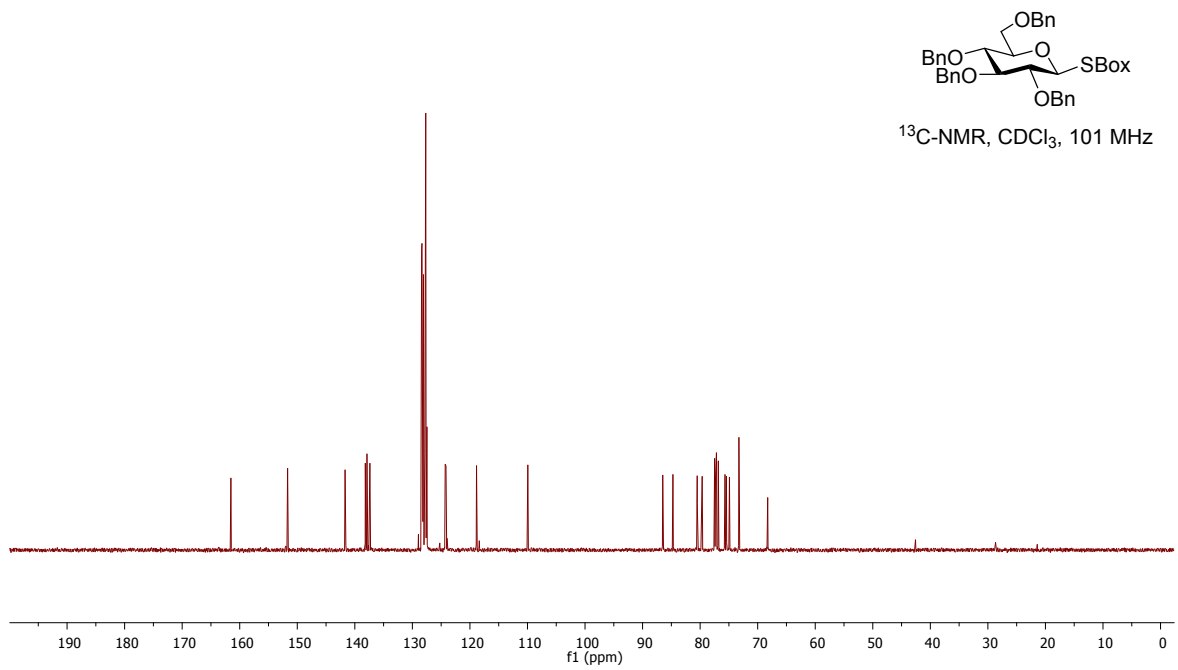

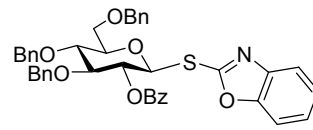

<sup>1</sup>H-NMR, CDCl<sub>3</sub>, 400 MHz

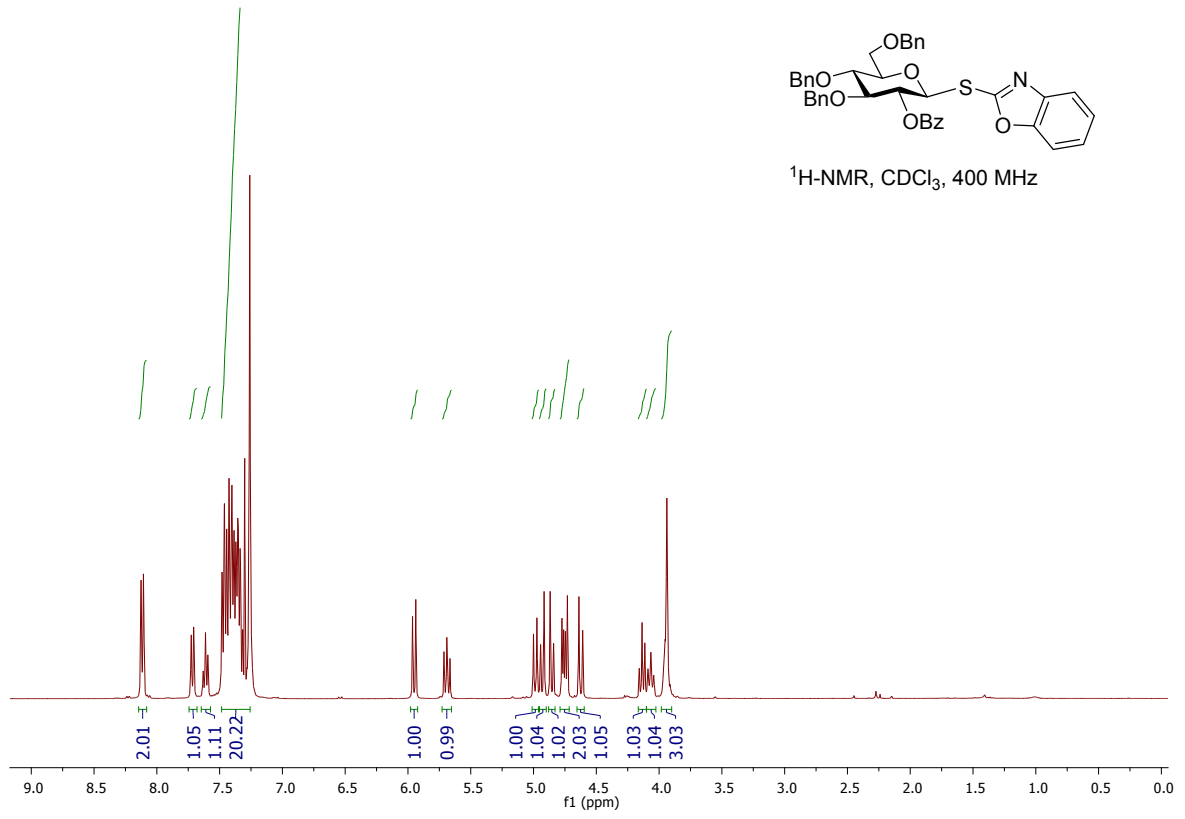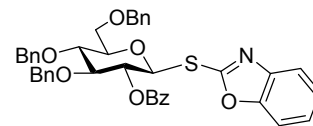

<sup>13</sup>C-NMR, CDCl<sub>3</sub>, 101 MHz

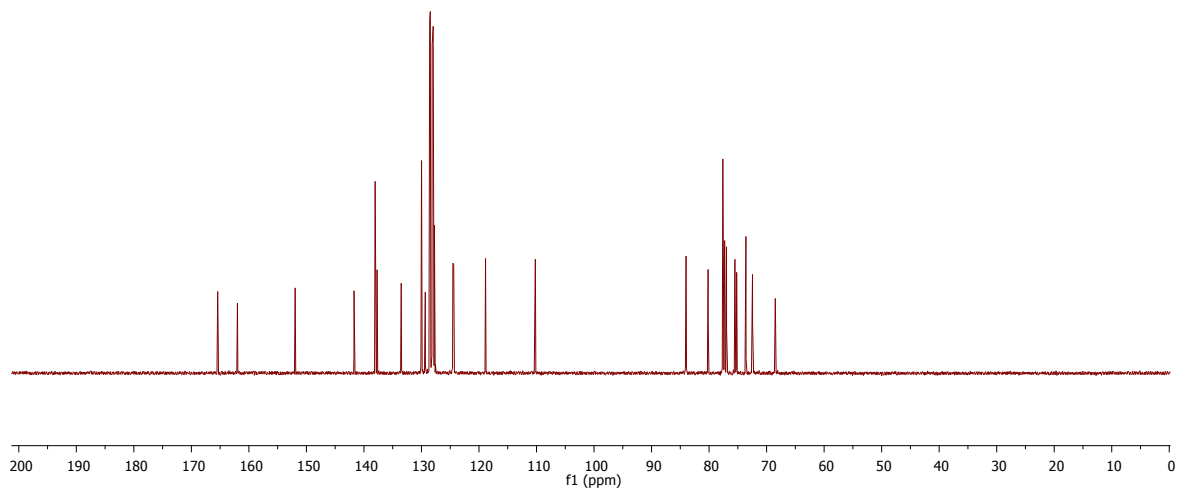

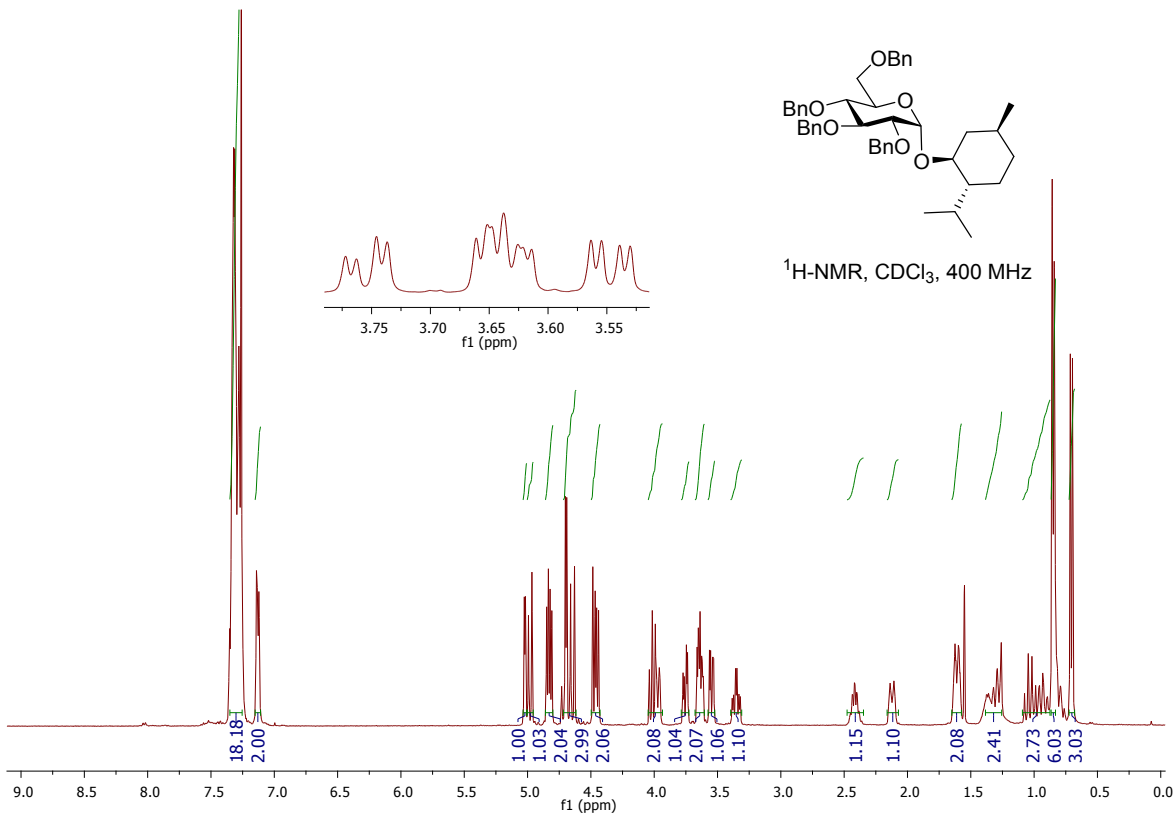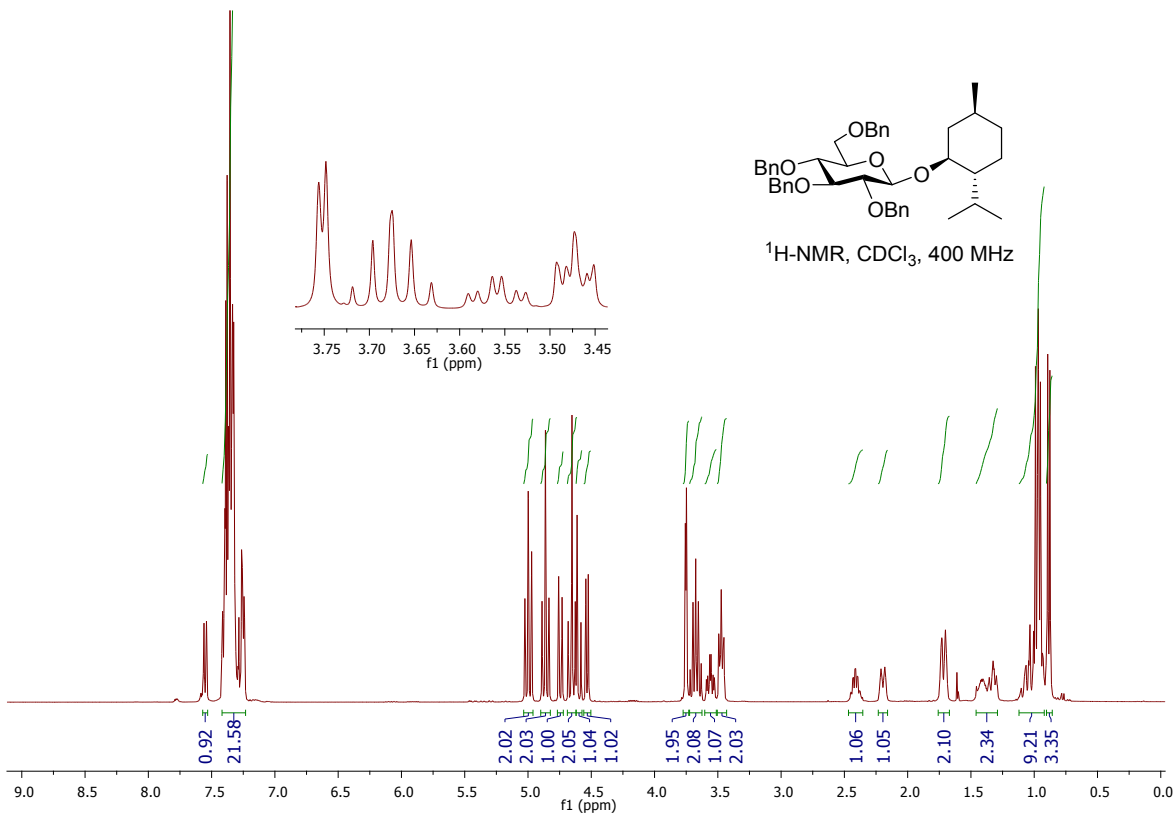



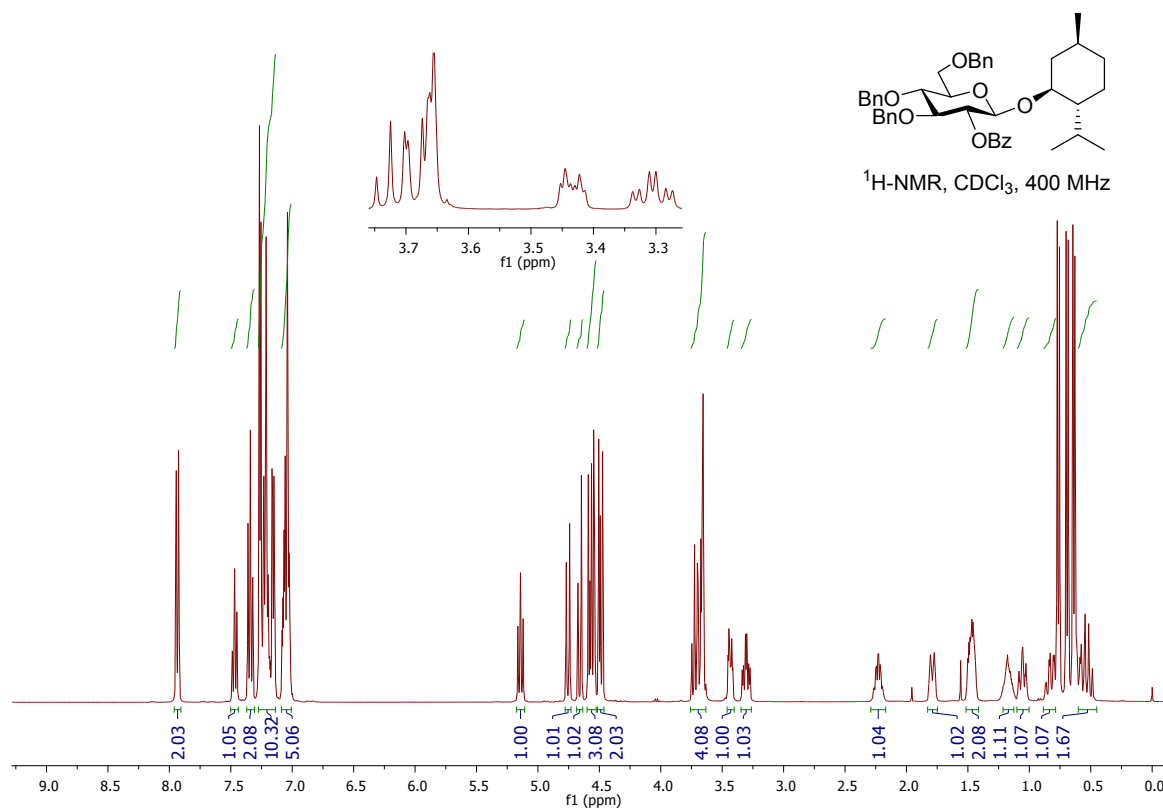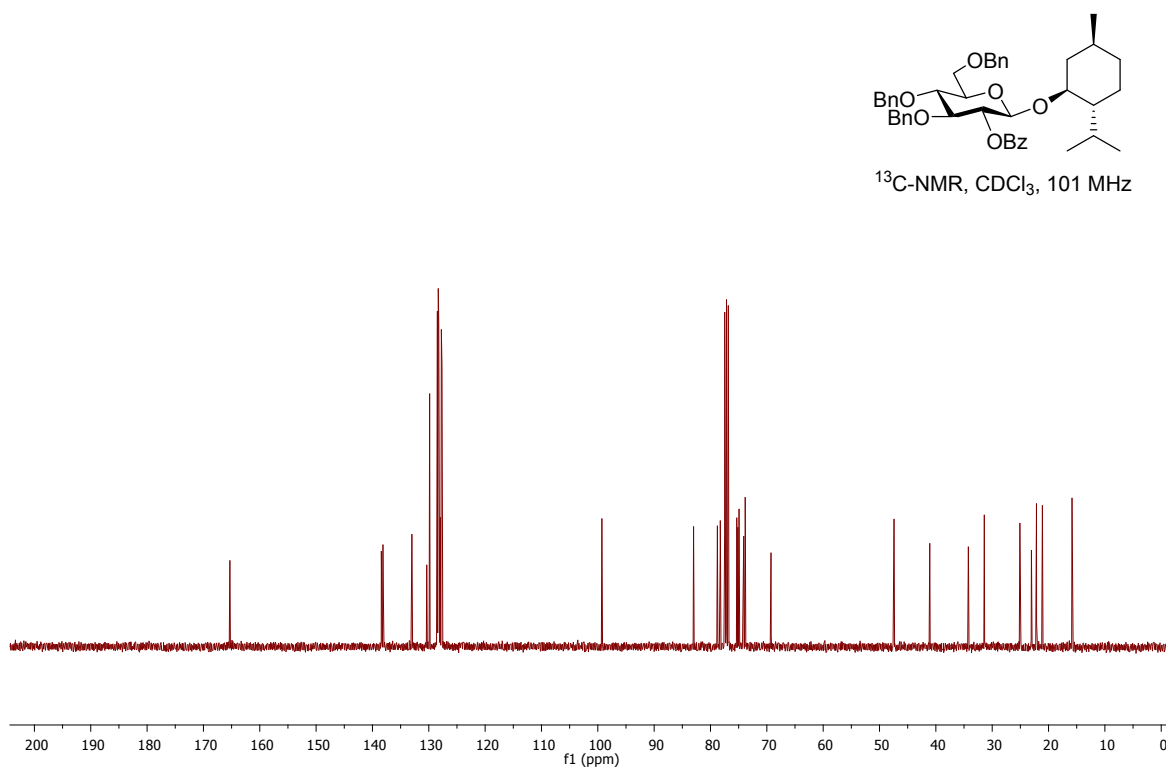

## Bibliography

- (1) Ferrier, R. J.; Hay, R. W.; Vethaviasar, N. *Carbohydr. Res.* **1973**, *27*, 55–61.
- (2) Buda, S.; Gołębiowska, P.; Mlynarski, J. *Eur. J. Org. Chem.* **2013**, 3988–3991.
- (3) Andersen, S. M.; Heuckendorff, M.; Jensen, H. H. *Org. Lett.* **2015**, *17*, 944–947.
- (3) Nicolaou, K. C.; Mitchell, H. J.; Jain, N. F.; Bando, T.; Hughes, R.; Winssinger, N.; Natarajan, S.; Koumbis, A. E. *Chem. - A Eur. J.* **1999**, *5*, 2648–2667.
- (4) Kamat, M. N.; Demchenko, A. V. *Org. Lett.* **2005**, *7*, 3215–3218.
- (5) Mydock, L. K.; Demchenko, A. V. *Org. Lett.* **2008**, *10*, 2103–2106.
- (6) Imagawa, H.; Kinoshita, A.; Fukuyama, T.; Yamamoto, H.; Nishizawa, M. *Tetrahedron Lett.* **2006**, *47*, 4729–4731.
- (7) Koide, K.; Ohno, M.; Kobayashi, S. *Tetrahedron Lett.* **1991**, *32*, 7065–7068.
- (8) Pragani, R.; Seeberger, P. H. *J. Am. Chem. Soc.* **2011**, *133*, 102–107.
